# Supplementary material
Source: PubMed Central journal article supplement (PMC7949192)
Supplement: NIHMS1673467-supplement-Supporting_Material.pdf [file NIHMS1673467-supplement-Supporting_Material.pdf]

# Effect of non-phosphorus corrosion inhibitors on biofilm pore structure and mechanical properties

Supporting Information

Conghui Huang<sup>1</sup>, Peter P. Sun<sup>1</sup>, Jungeun Won<sup>2</sup>, Yin Wang<sup>3</sup>, Stephen A. Boppart<sup>2</sup>, Thanh H. Nguyen\*<sup>1,4,5</sup>

1. Department of Civil and Environmental Engineering, University of Illinois at Urbana-Champaign, Urbana, Illinois, 61801, United States
2. Departments of Electrical and Computer Engineering and Bioengineering Beckman Institute for Advanced Science and Technology, University of Illinois at Urbana-Champaign, Urbana, Illinois, 61801, United States
3. Department of Civil and Environmental Engineering, University of Wisconsin – Milwaukee, Milwaukee, Wisconsin 53201, United States
4. Institute of Genomic Biology, University of Illinois at Urbana-Champaign, Urbana, Illinois, 61801, United States
5. Carle Illinois College of Medicine, University of Illinois at Urbana-Champaign, Urbana, Illinois, 61801, United States

## 23 1. Bacteria presence in these three biofilms

24 The presence of biofilms in this study was confirmed by measuring the 16S genes in the  
25 biofilm samples. We scraped and extracted DNA from silicate, tin, and groundwater biofilms  
26 using FastDNA Spin Kit For Soil (MP Biomedicals). We determined the presence and absence  
27 of bacteria by quantitative polymerase chain reaction (qPCR) using a primer set (341F:  
28 CCTACGGGAGGCAGCAG; 518R: ATTACCGCGGCTGCTGG) amplifying the V3 region of  
29 the 16S rRNA gene.<sup>1</sup> A reaction volume of 15  $\mu$ L containing 400 mM of forward and reverse  
30 primers, 7.5  $\mu$ L of Applied Biosystems<sup>TM</sup> PowerUp<sup>TM</sup> SYBR<sup>TM</sup> Green Master Mix (2x), 4.3  $\mu$ L  
31 of nuclease-free water, and 2  $\mu$ L of DNA templates was prepared for each qPCR sample. The  
32 DNA samples were serial diluted from 10 to 1000 times to avoid qPCR inhibition introduced  
33 from EPS components. Triplicates were used in qPCR. The DNA was denatured at 95 °C for 10  
34 minutes followed by 40 cycles of 15 seconds at 95 °C and 1 minute at 60 °C. Nuclease-free water  
35 was used as the negative control. The corresponding cycle number (Ct), which was above 29,  
36 served as the threshold of the presence of bacterial genomes in the DNA samples. Because lower  
37 Ct numbers in the range of 19-23 were detected in the DNA extracted from the coupons (10 to  
38 1000 times dilutions) compared to the negative control, biofilms have covered the PVC coupons  
39 after at least 6 months in the CDC reactors fed by groundwater amended with different corrosion  
40 inhibitors.

41

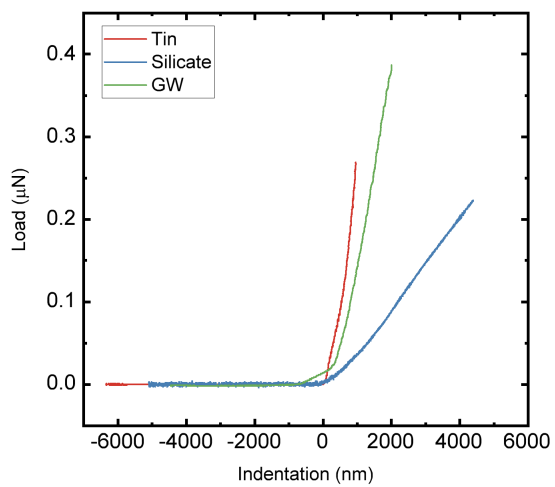

42  
43 **Figure S1:** A representative force ( $\mu\text{N}$ ) vs. indentation (nm) of the tip during indentation to the  
44 silicate biofilms (blue), tin biofilms (red), and groundwater biofilms (green).  
45

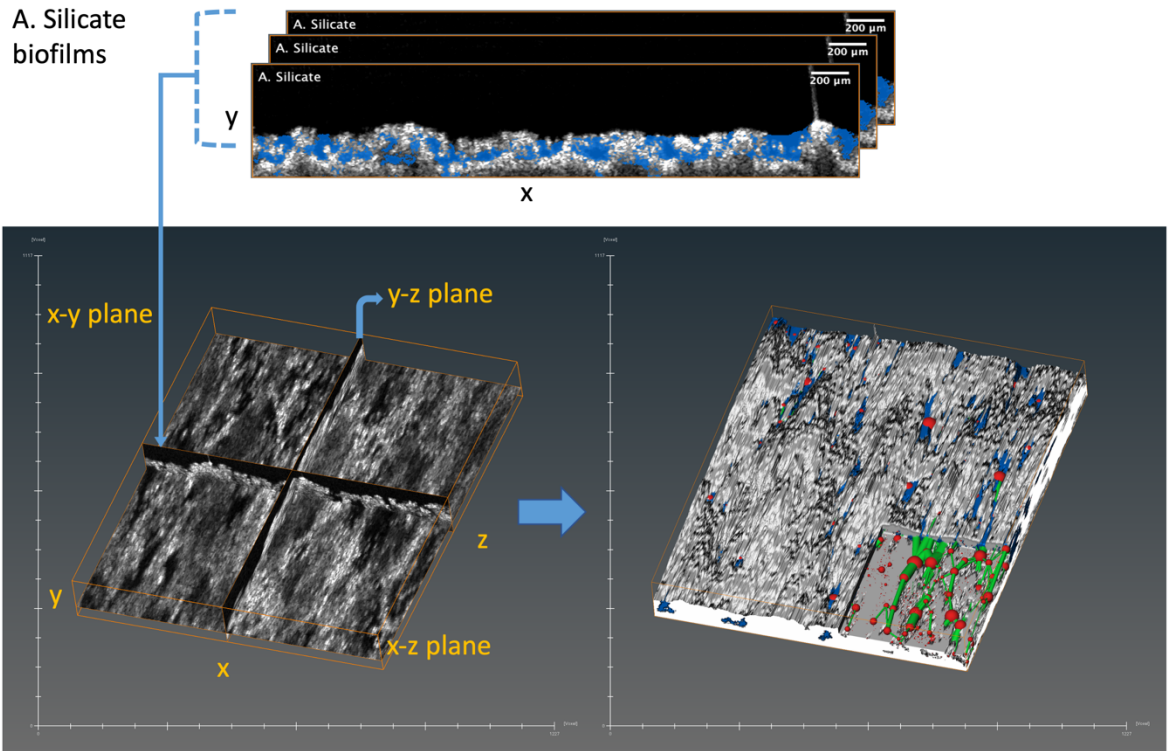

46

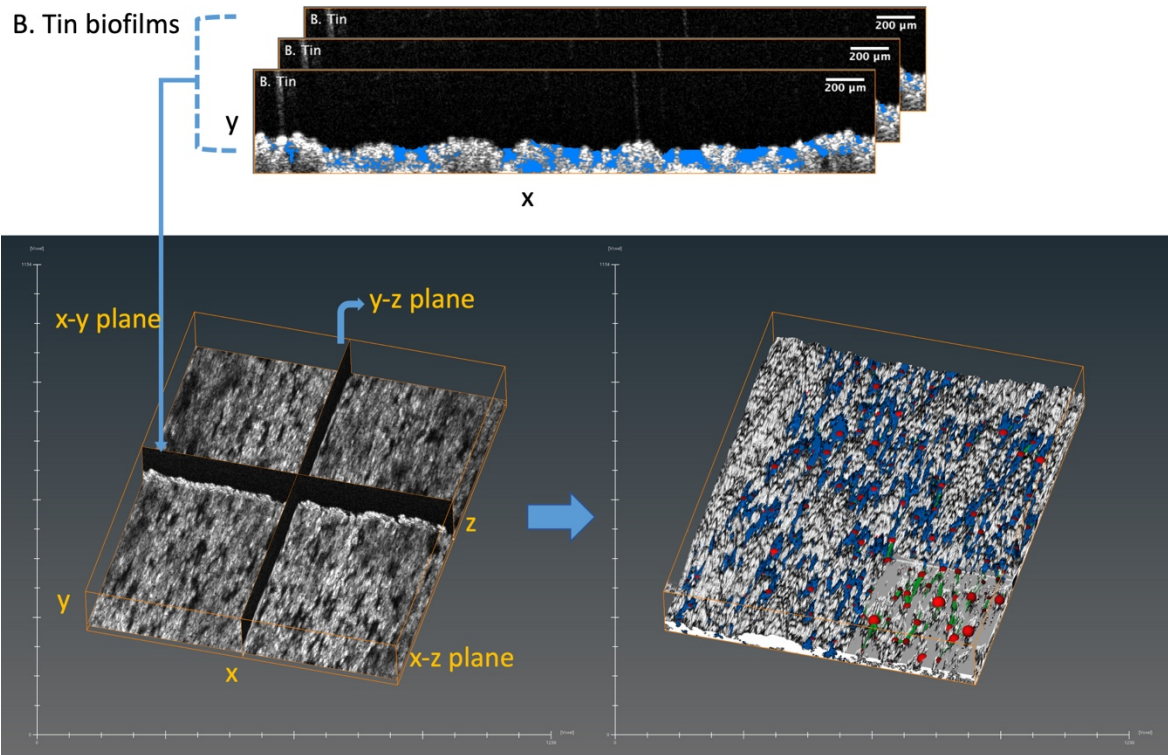

47

48 **Figure S2.** Image (x-y plane) stack obtained from OCT imaging scanning was shown in the top  
 49 section. The ortho-slices (images orthogonal to the xy, yz, and xz plane) of a three-dimensional  
 50 image stack were shown in the bottom left. Non-zero intensity pixels (white) represented  
 51 biomass and zero intensity pixels (black) represented pore space. Orange lines marked the  
 52 bounding boundary of the image stack. The representative of the 3D reconstruction of silicate

53 (A) and tin (B) biofilms were shown in bottom right. Blue marked the pore space; white marked  
 54 the biomass. The pore space was characterized as a network constructed by red spherical pores  
 55 connected by green cylindrical throats. The pore network was not drawn to scale. The upper 100  
 56  $\mu\text{m}$  from the maximum biofilm thickness in the right corner of the 3D reconstruction was  
 57 removed to show the pore network.  
 58  
 59

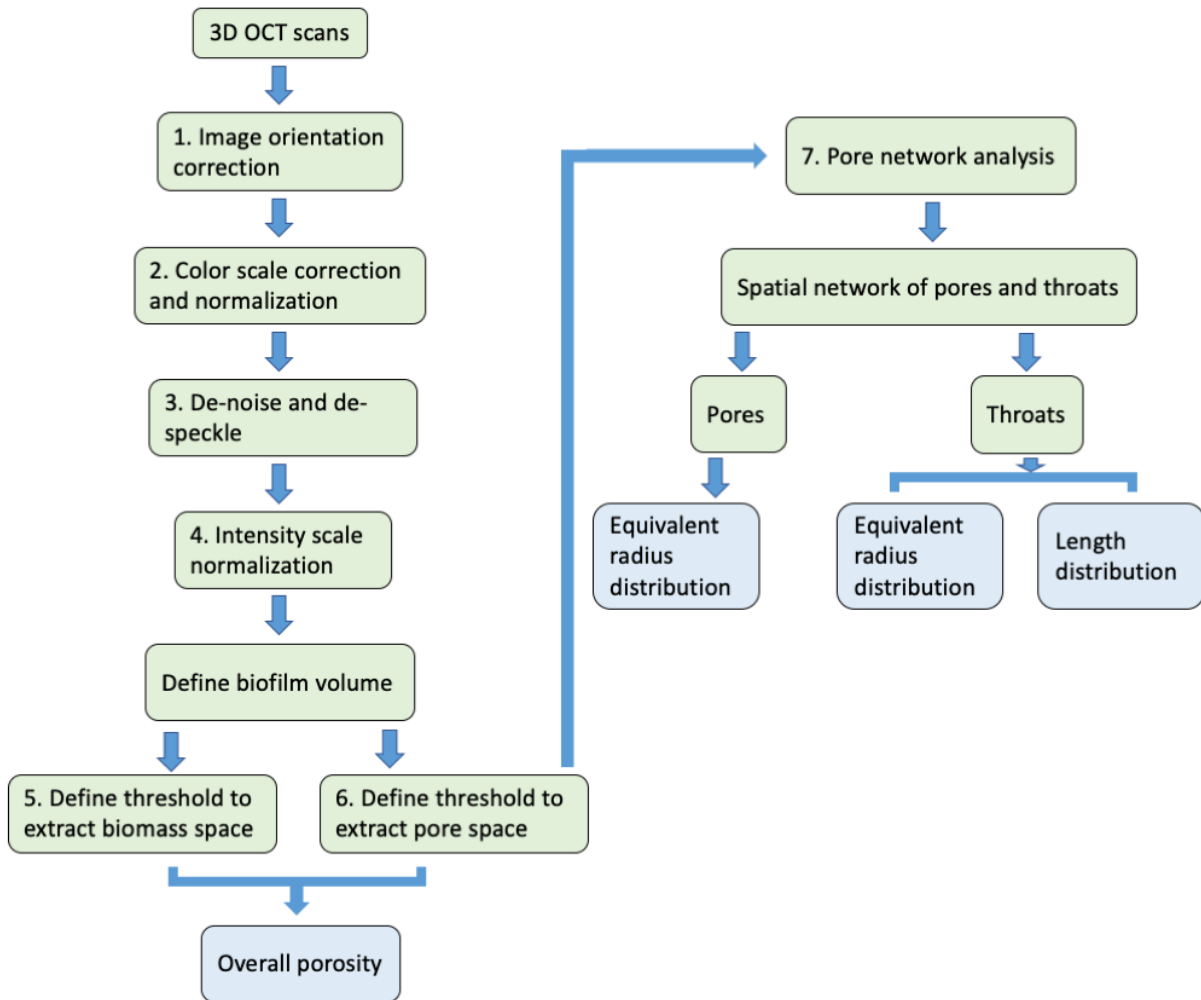

60  
 61  
 62 **Figure S3.** Flow diagram of the image processing steps and the pore network analysis. Green  
 63 boxes indicated the image processing procedures and blue boxes indicated the output results.  
 64

65

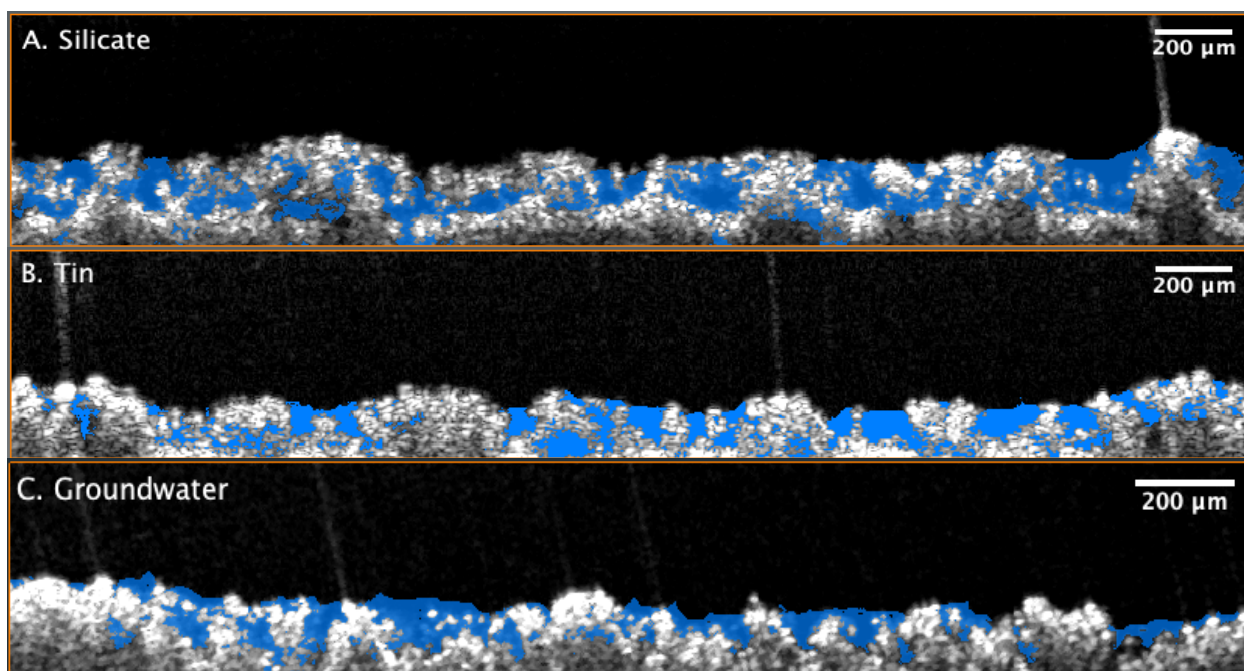

66

67

68

69

70

71

72

**Figure S4.** Representative OCT images of A) silicate, B) tin, and C) groundwater biofilms. Biofilms were identified as white while pore space was identified as blue.

73

74 **References**

- 75 1. Shen, Y.; Huang, C.; Lin, J.; Wu, W.; Ashbolt, N. J.; Liu, W.-T.; Nguyen, T. H.,  
76 Effect of disinfectant exposure on *Legionella pneumophila* associated with simulated drinking  
77 water biofilms: release, inactivation, and infectivity. *Environmental Science & Technology* **2017**.  
78
